# Supplementary material for: Cblb-deficient T cells are less susceptible to PD-L1-mediated inhibition
Source: PubMed Central journal article supplement (PMC5522032; doi:10.18632/oncotarget.18360), 2017-06-03
Supplement: oncotarget-08-41841-s001.pdf [file oncotarget-08-41841-s001.pdf]

# ***Cblb*-deficient T cells are less susceptible to PD-L1-mediated inhibition**

## **Supplementary Material**

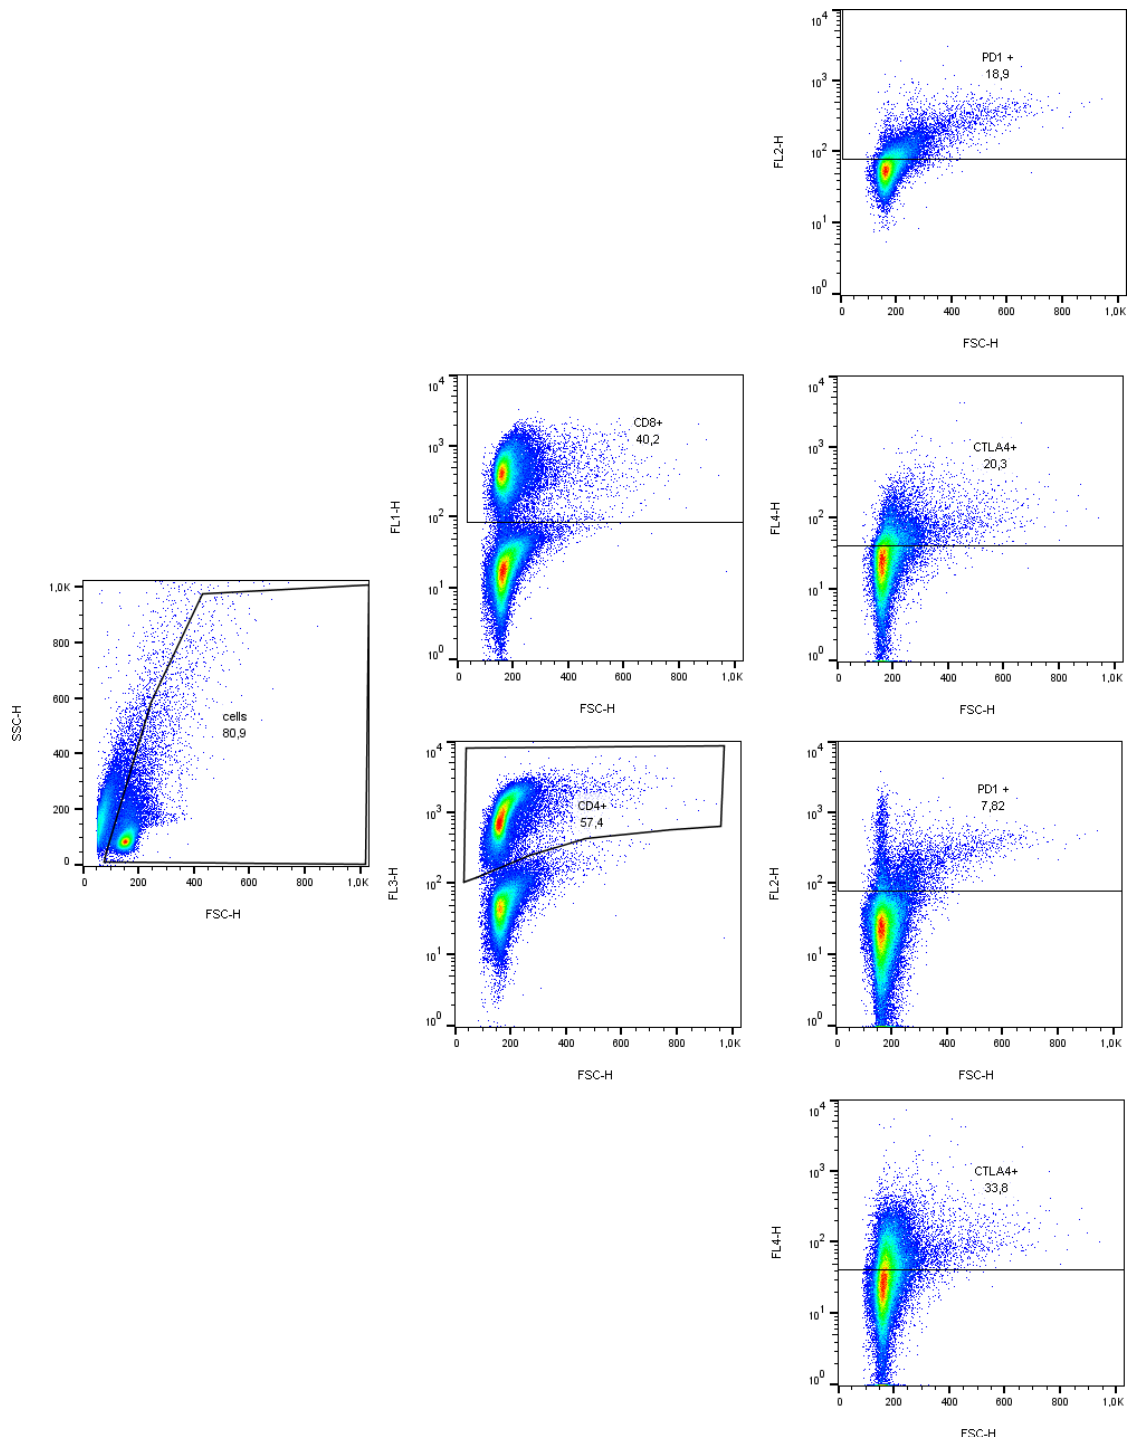

**Supplementary Figure 1: Gating strategy of the results presented in figures 5A-D. FL1: CD8 FITC; FL2: PD-1 PE; FL3: CD4 PeCy7; FL4: CTLA-4 APC**

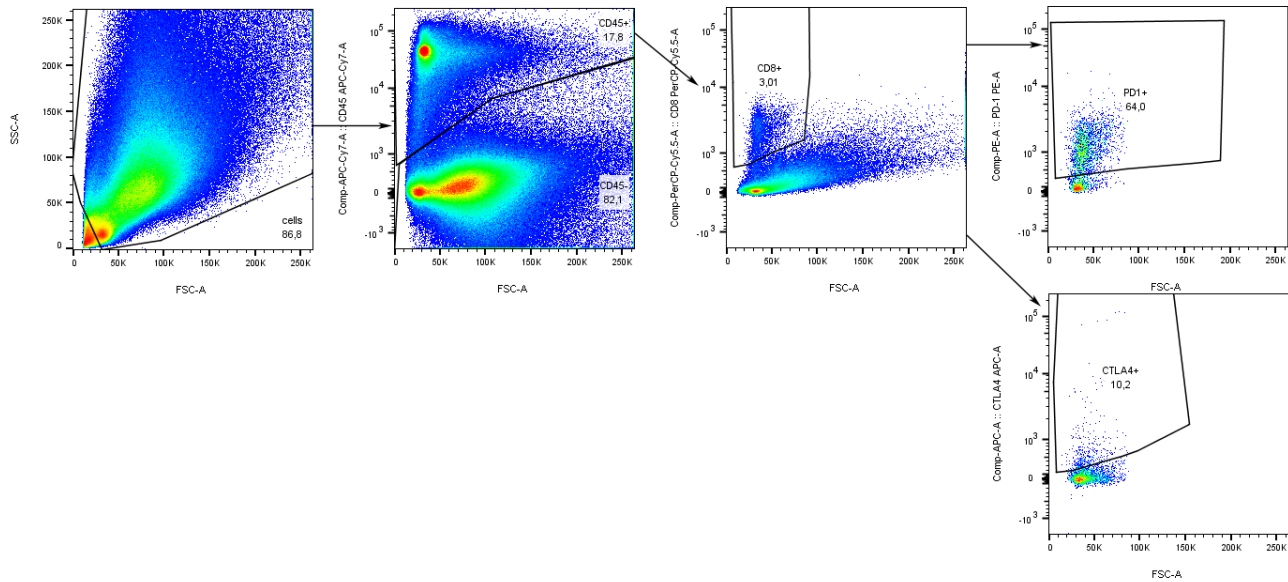

Supplementary Figure 2: Gating strategy of the results presented in figures 5E, F.

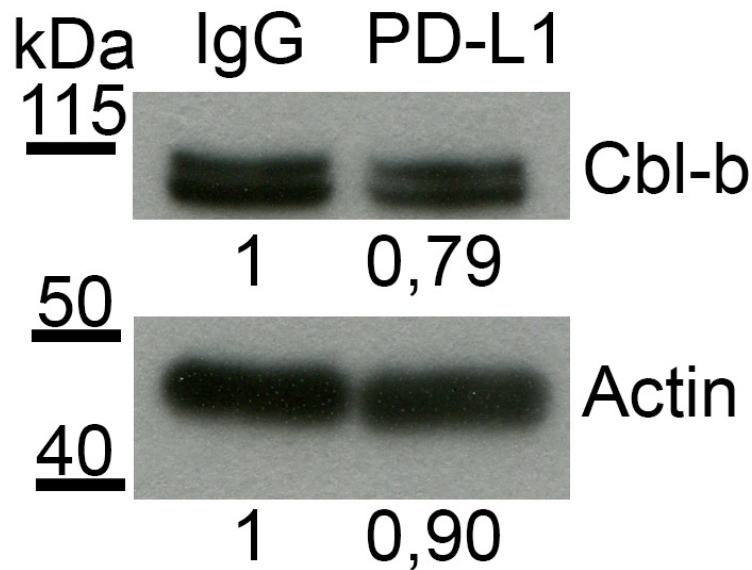

Supplementary Figure 3: Western blot analysis of Cbl-b in T cells treated with or without PD-L1. CD3<sup>+</sup> cells were stimulated overnight with 1 $\mu$ g/ml plate-bound anti-CD3 and 1 $\mu$ g/ml soluble anti-CD28. 10 $\mu$ g/ml recombinant PD-L1 or control IgG was added as indicated. One of two experiments with similar results is shown. Actin served as a loading control. Numbers indicate relative expression levels.
